# Supplementary material for: Engineering a pyridoxal 5’-phosphate supply for cadaverine production by using Escherichia coli whole-cell biocatalysis
Source: PubMed Central journal article supplement (PMC4614675; doi:10.1038/srep15630), 2015-10-22
Supplement: srep15630-s1.pdf [file srep15630-s1.pdf]

## SUPPLEMENTARY MATERIAL

### Engineering a pyridoxal 5'-phosphate supply for cadaverine production by using

#### *Escherichia coli* whole-cell biocatalysis

Weichao Ma<sup>1,2,3</sup>, Weijia Cao<sup>1,2</sup>, Bowen Zhang<sup>1,2</sup>, Kequan Chen<sup>1,2\*</sup>, Quanzhen Liu<sup>1,2</sup>, Yan Li<sup>1,2</sup>, and Pingkai Ouyang<sup>1,2</sup>

### Supplementary Methods

#### Construction of strains and plasmids

Bacterial strains and plasmids are summarized in Table S1. All the PCR primers are listed in Table S2.

The *E. coli cadA* gene, encoding a lysine decarboxylase protein, were amplified from *E. coli* BL21 (DE3) genomic DNA (GenBank: AM946981.2) using primers CadA-NdeI-Duet-F and CadA-KpnI-Duet-R. The PCR product was introduced into the *NdeI* and *KpnI* sites of pETDuet-1 to generate pETDuet-CadA.

The operon comprising *pdxS* and *pdxT* was amplified from *Bacillus subtilis* NJ308 Genomic DNA template with primers pair PdxST-NcoI-F and PdxST-SalI-R, the PCR fragment was digested with *NcoI* and *SalI*, and ligated into pTrc99A, generating pTrc99A-pdxST.

To construct pET-cadA-TrcST, the *Ptrc* (*trc* promoter)-*pdxST*-*rrnB* cassette was amplified with primers pair Trc-promoter-XbaI and Trc-termi-XbaI using pTrc99A-pdxST as the template. Then the fragment was digested by *XbaI*, and ligated into pETDuet-CadA linearized with *AvrII*.

The fragment containing the *araBAD* promoter and *araC* gene was amplified with the primers

1 Para-Spe-Xba-F and Para-Nco-Bam-R using plasmid pKD46 as the template and was subsequently  
2 digested with *NcoI* and *XbaI*. The resulting fragment, together with the 4.2-kb *NotI-NcoI* fragment of  
3 pET-cadA-TrcST containing the cassette of T7 promoter-cadA and *pdxST* genes, were inserted into the  
4 *NotI* and *AvrII* sites of pETDuet-CadA to yield pET-cadA-BADST.

5 To construct pCWJ-pdxST, the fragment containing *pdxST* coding sequence was digested by *NcoI*  
6 and *Sall*, and ligated into the same restriction sites of plasmid pCWJ.

7 The constructed plasmids pTrc99A-pdxST and pET-cadA-TrcST were separately transformed into  
8 *E.coli* Trans1-T1 (TransGen Biotech, Beijing, China) to create strains Trans-ST and Trans-AST,  
9 respectively. The plasmids pETDuet-CadA, pET-cadA-TrcST and pET-cadA-BADST were separately  
10 transformed into *E.coli* BL21(DE3) (TransGen Biotech, Beijing, China) to yield strains BL-CadA,  
11 AST1 and AST2, respectively. The plasmids pETDuet-CadA and pCWJ-pdxST were co-transformed  
12 into *E.coli* BL21(DE3) and defined as strain AST3.

13

#### 14 **Determination of intracellular level of Pyridoxal 5'-phosphate**

15 10 mg (dry cell weight) cell pellets of the 6 h IPTG-induced *E. coli* cells were resuspended in 1.5  
16 mL phosphate buffered saline (PBS, pH 7.4, Sigma) containing 100 µg/mL lysozyme, 10 µg/mL RNase  
17 A, and 5 µg/mL DNase I. After incubation on ice for 1 hour, bacteria were broken by sonication, and  
18 20 µg of Proteinase K was added to each sample and incubated on ice for 30 minutes. Then proteins  
19 were precipitated by adding chilled 100% Trichloroacetic acid (TCA) at 1/10 of the sample volume. The  
20 samples were vortexed for 1 min and incubated 15 min on ice, and then were centrifuged for 10 min at  
21 12,000×g at 4 °C. The supernatant was cleared by 0.2 µm filtration.

22 The separation, identification, and quantification of pyridoxal 5'-phosphate was conducted by

1 high-performance liquid chromatography (HPLC), following modifications of the procedure described  
2 by Cabo *et al.* and Kimura *et al.*<sup>1,2</sup>, using an Agilent (Santa Clara, CA, USA) 1290 Infinity System  
3 equipped with a fluorescence detector (FLD G1321B). The stationary phase was a reverse-phase  
4 column Prevail C18 (250 mm × 4.6 mm × 5 μm) (Grace, Columbia, MD, USA). The mobile phase  
5 consisted of buffer A: 0.1 M potassium phosphate monobasic, 0.1 M sodium perchlorate and 0.5 g/L  
6 sodium bisulfite; buffer B: 0.1 M potassium phosphate monobasic, 0.1 M sodium perchlorate, 0.5 g/L  
7 sodium bisulfite and 20% acetonitrile. The pH of the buffers A and B were adjusted to 3.0 by adding  
8 phosphoric acid. The following gradient for the mobile phase was used: buffer A, 100%, from 0 to 4  
9 min and buffer B, 27%, from 4.1 to 13 min. An additional 5-min step was included to reach the initial  
10 conditions and achieve mobile phase stabilization. The flow rate was 1 mL/min, and the injection  
11 volume was 20 μL. The temperature of the column was 25 ± 1 °C, and fluorescence was measured at an  
12 excitation wavelength of 300 nm and an emission wavelength of 400 nm.

13

14

- 15 1. Cabo, R. *et al.* A simple high-performance liquid chromatography (HPLC) method for the  
16 measurement of pyridoxal-5-phosphate and 4-pyridoxic acid in human plasma. *Clinica chimica*  
17 *acta; international journal of clinical chemistry* **433**, 150-156 (2014).
- 18 2. Kimura, M., Kanehira, K. & Yokoi, K. Highly sensitive and simple liquid chromatographic  
19 determination in plasma of B6 vitamers, especially pyridoxal 5'-phosphate. *Journal of*  
20 *Chromatography* **722**, 295-301 (1996).

21

1

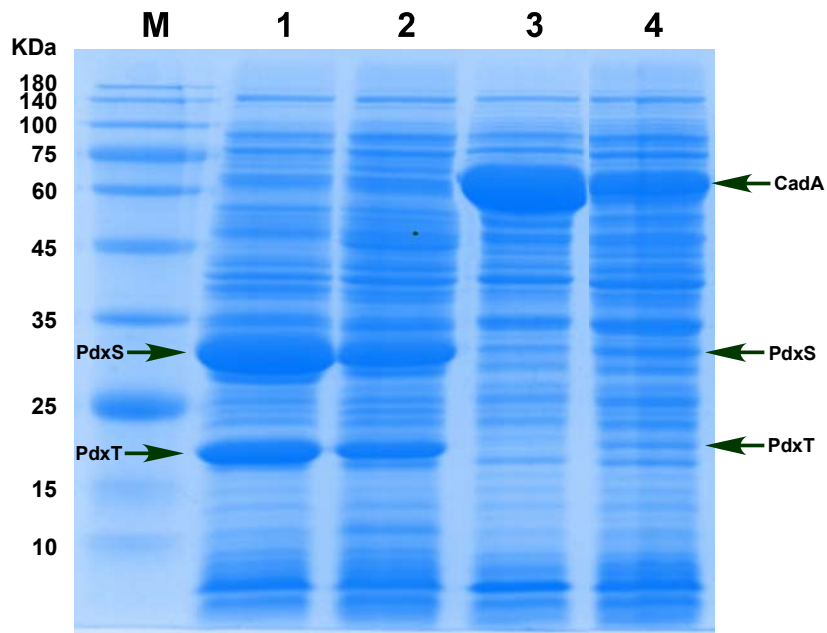

2

3 **Supplementary Figure S1. SDS-PAGE analysis of the expression of PdxS, PdxT and CadA.** Lane

4 1, total protein in strain Trans-ST; Lane 2, total protein in strain Trans-AST; Lane 3, total protein in

5 strain BL-CadA; Lane 4, total protein in strain AST1. The samples were collected after 6 h of induction

6 with IPTG.

7

8

9

1 **Table S1.** Strains and plasmids used in this work

| Strains or plasmids            | Description                                                                                                                                                                                                                                                                                                               | Source or Refs.  |
|--------------------------------|---------------------------------------------------------------------------------------------------------------------------------------------------------------------------------------------------------------------------------------------------------------------------------------------------------------------------|------------------|
| Strains                        |                                                                                                                                                                                                                                                                                                                           |                  |
| <i>Bacillus subtilis</i> NJ308 | Wild-type                                                                                                                                                                                                                                                                                                                 | Lab stock        |
| <i>E. coli</i> Trans1-T1       | F <sup>-</sup> $\phi$ 80( <i>lacZ</i> ) $\Delta$ M15 $\Delta$ <i>lacX74</i> <i>hsdR</i> (r <sub>K</sub> <sup>-</sup> , m <sub>K</sub> <sup>+</sup> ) $\Delta$ <i>recA</i> 1398<br><i>endA</i> 1 tonA;<br><i>E. coli</i> host for gene cloning and for expression of proteins under the control of the <i>trc</i> promoter | TransGen Biotech |
| <i>E. coli</i> BL21(DE3)       | F <sup>-</sup> <i>ompT</i> <i>hsdS</i> (r <sub>B</sub> <sup>-</sup> , m <sub>B</sub> <sup>-</sup> ) <i>gal dcm</i> (DE3); <i>E. coli</i> host for protein expression                                                                                                                                                      | TransGen Biotech |
| BL-CadA                        | BL21(DE3) harboring pETDuet-CadA                                                                                                                                                                                                                                                                                          | Ma et al.        |
| Trans-ST                       | <i>E. coli</i> Trans1-T1 harboring pTrc99A-pdxST                                                                                                                                                                                                                                                                          | This work        |
| Trans-AST                      | <i>E. coli</i> Trans1-T1 harboring pET-cadA-TrcST                                                                                                                                                                                                                                                                         | This work        |
| AST1                           | BL21(DE3) harboring pET-cadA-TrcST                                                                                                                                                                                                                                                                                        | This work        |
| AST2                           | BL21(DE3) harboring pET-cadA-BADST                                                                                                                                                                                                                                                                                        | This work        |
| AST3                           | BL21(DE3) harboring pETDuet-CadA and pCWJ-pdxST                                                                                                                                                                                                                                                                           | This work        |
| Plasmids                       |                                                                                                                                                                                                                                                                                                                           |                  |
| pETDuet-1                      | ColE1 <i>ori</i> , <i>lacI</i> gene, Amp <sup>r</sup> , T7 promoters                                                                                                                                                                                                                                                      | Novagen          |
| pTrc99A                        | pMB1 <i>ori</i> , <i>lacI</i> gene, Amp <sup>r</sup> , <i>trc</i> promoter                                                                                                                                                                                                                                                | Lab stock        |
| pCWJ                           | RSF <i>ori</i> , <i>lacI</i> gene, Cm <sup>r</sup> , <i>trc</i> promoter                                                                                                                                                                                                                                                  | Lab stock        |
| pKD46                          | pSC101 <i>ori</i> , Amp <sup>r</sup> , $\lambda$ Red recombinase under arabinose-inducible araBAD promoter                                                                                                                                                                                                                | Lab stock        |
| pETDuet-CadA                   | ColE1 <i>ori</i> , <i>lacI</i> gene, Amp <sup>r</sup> , T7 promoters, <i>cadA</i> inserted between <i>Nde</i> I– <i>Kpn</i> I sites of pETDuet-1                                                                                                                                                                          | Ma et al.        |
| pTrc99A-pdxST                  | pMB1 <i>ori</i> , <i>lacI</i> gene, Amp <sup>r</sup> , <i>trc</i> promoter, Native <i>pdxST</i> operon of <i>B. subtilis</i> NJ308 inserted between the <i>Nco</i> I and <i>Sal</i> I sites of pTrc99A                                                                                                                    | This work        |
| pET-cadA-TrcST                 | ColE1 <i>ori</i> , <i>lacI</i> gene, Amp <sup>r</sup> , <i>P<sub>trc</sub></i> ( <i>trc</i> promoter)- <i>pdxST</i> - <i>rrnB</i> cassette inserted into <i>Avr</i> II site of plasmid pETDuet-CadA                                                                                                                       | This work        |
| pET-cadA-BADST                 | ColE1 <i>ori</i> , <i>lacI</i> gene, Amp <sup>r</sup> , P <sub>BAD</sub> -controlled <i>pdxST</i> and P <sub>T7</sub> -controlled <i>cadA</i>                                                                                                                                                                             | This work        |
| pCWJ-pdxST                     | RSF <i>ori</i> , <i>lacI</i> gene, Cm <sup>r</sup> , P <sub>trc</sub> -controlled <i>pdxST</i>                                                                                                                                                                                                                            | This work        |

1 **Table S2.** Primers used in this work (restriction sites are underlined)

| Primer            | Sequence                                                            |
|-------------------|---------------------------------------------------------------------|
| CadA-NdeI-Duet-F  | GGAATTCC <u>ATATGA</u> ACGTTATTGCAATATTG                            |
| CadA-KpnI-Duet-R  | GGGGT <u>ACCTTAT</u> TTTTTGCTTTCTTCTTTC                             |
| PdxST-NcoI-F      | CATG <u>CCATGG</u> CTCAAACAGGTAAGTGAACG                             |
| PdxST-SalI-R      | ACGCGT <u>CGACTT</u> TATACAAGTGCCTTTTGCTTATATTCCTCAACC              |
| Trc-promoter-XbaI | CTAGT <u>CTAG</u> ATTGACAATTAATCATCCGGCTCG                          |
| Trc-termi-XbaI    | CTAGT <u>CTAG</u> AATTTGTCCTACTCAGGAGAGCGTTC                        |
| Para-Spe-Xba-F    | CCCACTAGT <u>CTAGA</u> ATCGATTTATTATGACAACCTTGACGGCTACA<br>TCATTCAC |
| Para-Nco-Bam-R    | CATAGGAT <u>CCATGG</u> TTTATAACCTCCTTAGAGCTCGAATTCCC                |

2
